# Supplementary material for: High-performance formaldehyde gas-sensors based on three dimensional center-hollow ZnO
Source: Royal Society of Chemistry journal article supplement (doi:10.1039/c5cp05935f), 2015-01-01
Supplement: c5cp05935f1.pdf [file c5cp05935f1.pdf]

# High-performance formaldehyde gas-sensor based on three dimensional center-hollow ZnO

Linqi Shi, Jiabao Cui, Fei Zhao, Dejun Wang, Tengfeng Xie, Yanhong Lin\*

*College of Chemistry, Jilin University, Changchun 130012, P.R (China)*

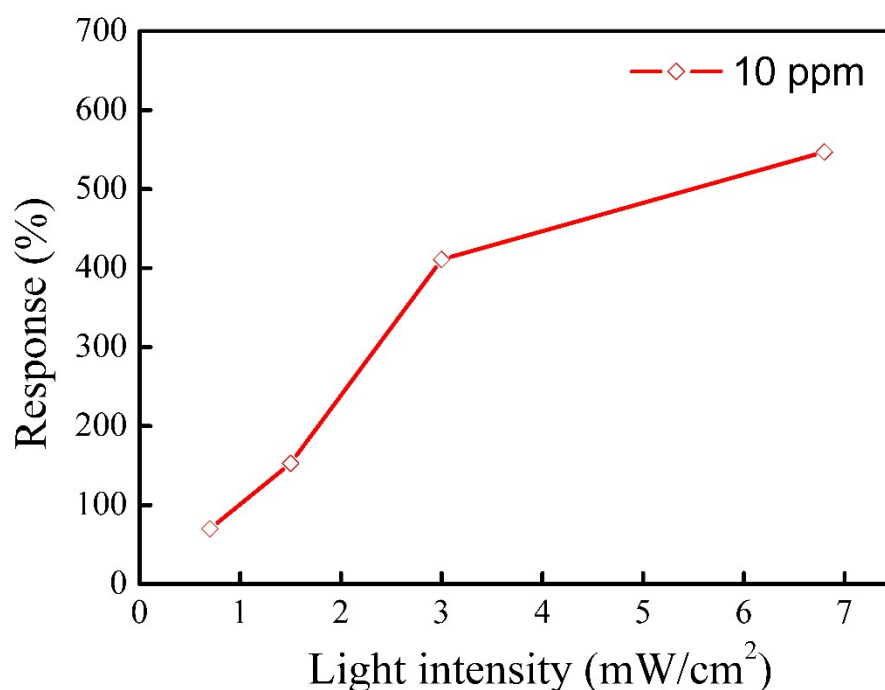

Fig. 1s Plot of response (% change in baseline current) vs. light intensity when 3D-ZnO sensor were exposed to 10 ppm formaldehyde vapor.

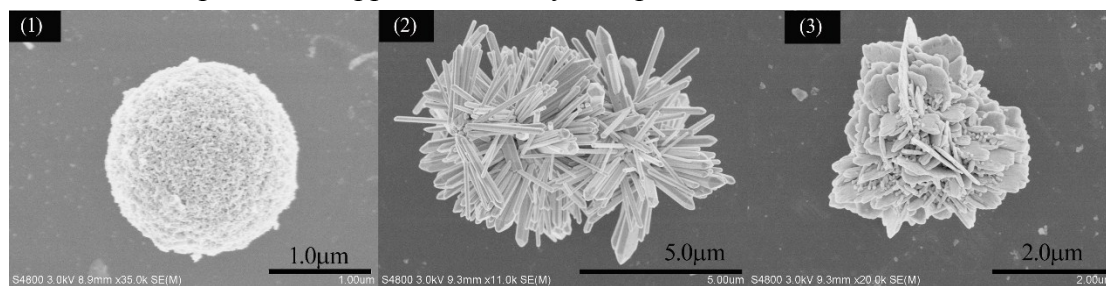

Fig. 2s The SEM images of the hollowspheres ZnO (d), the nanorods-flowers ZnO (e) and the nanoplates-flowers ZnO (f).

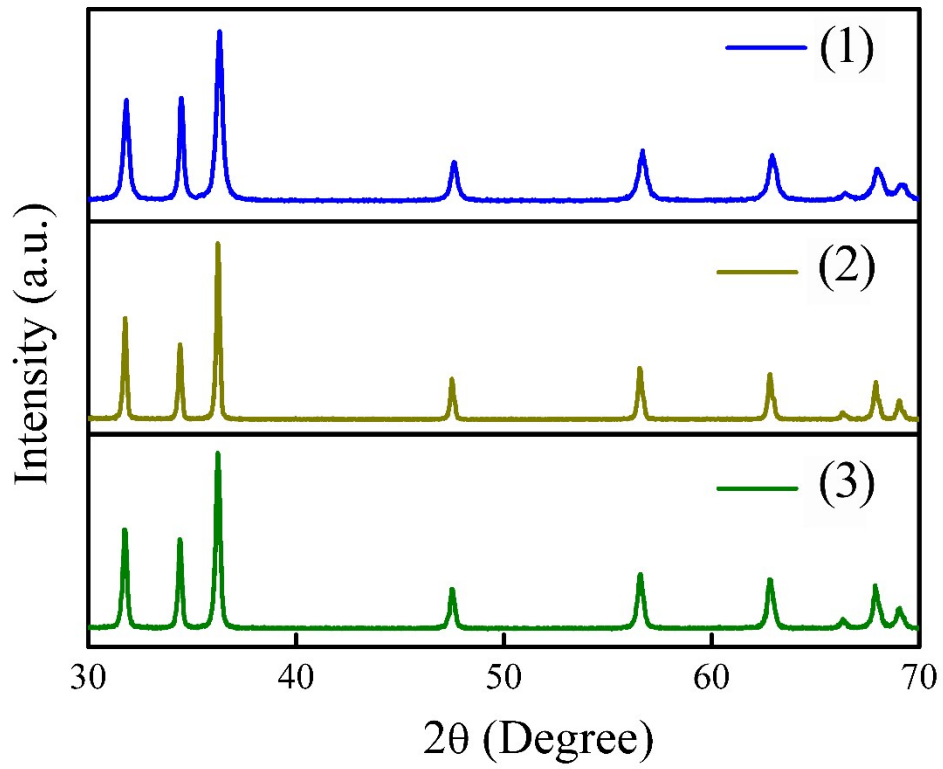

Fig. 3s The XRD of the hollowspheres ZnO (d), the nanorods-flowers ZnO (e) and the nanoplates-flowers ZnO (f).
